# Supplementary material
Source: PubMed Central journal article supplement (PMC7068689)

# Figure S1

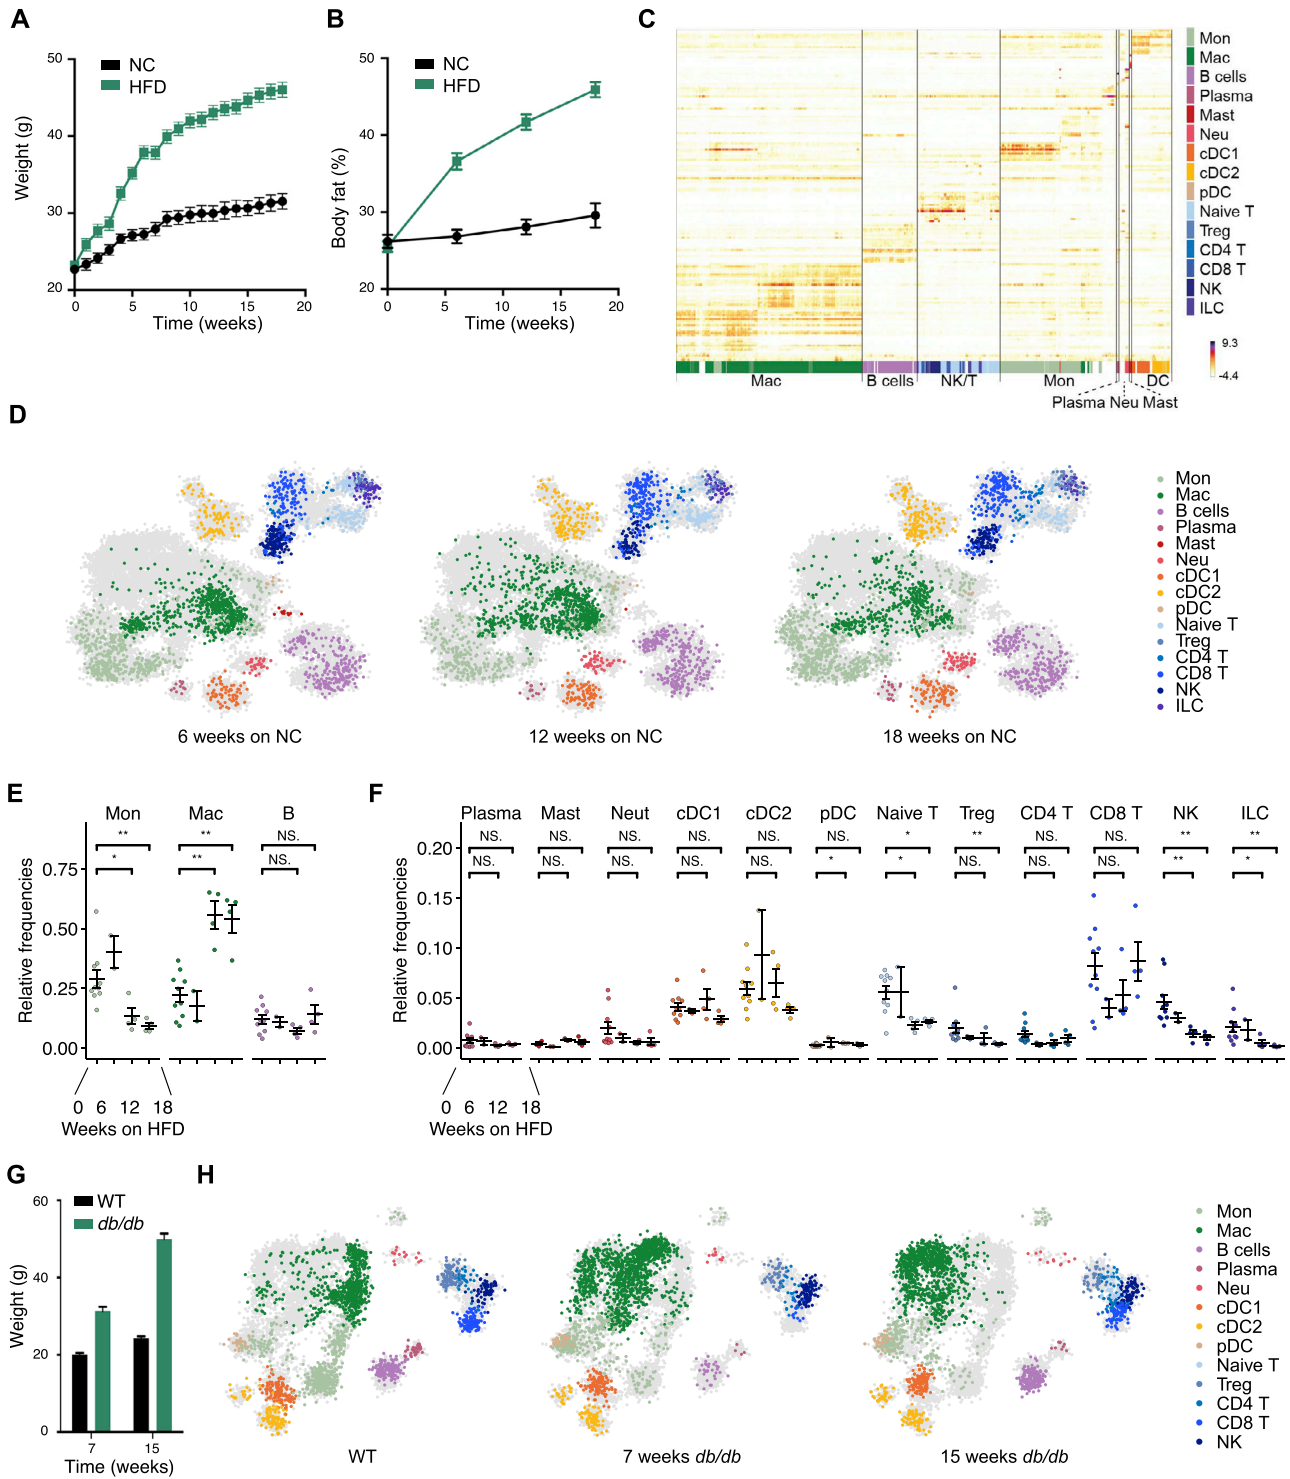

# Figure S2

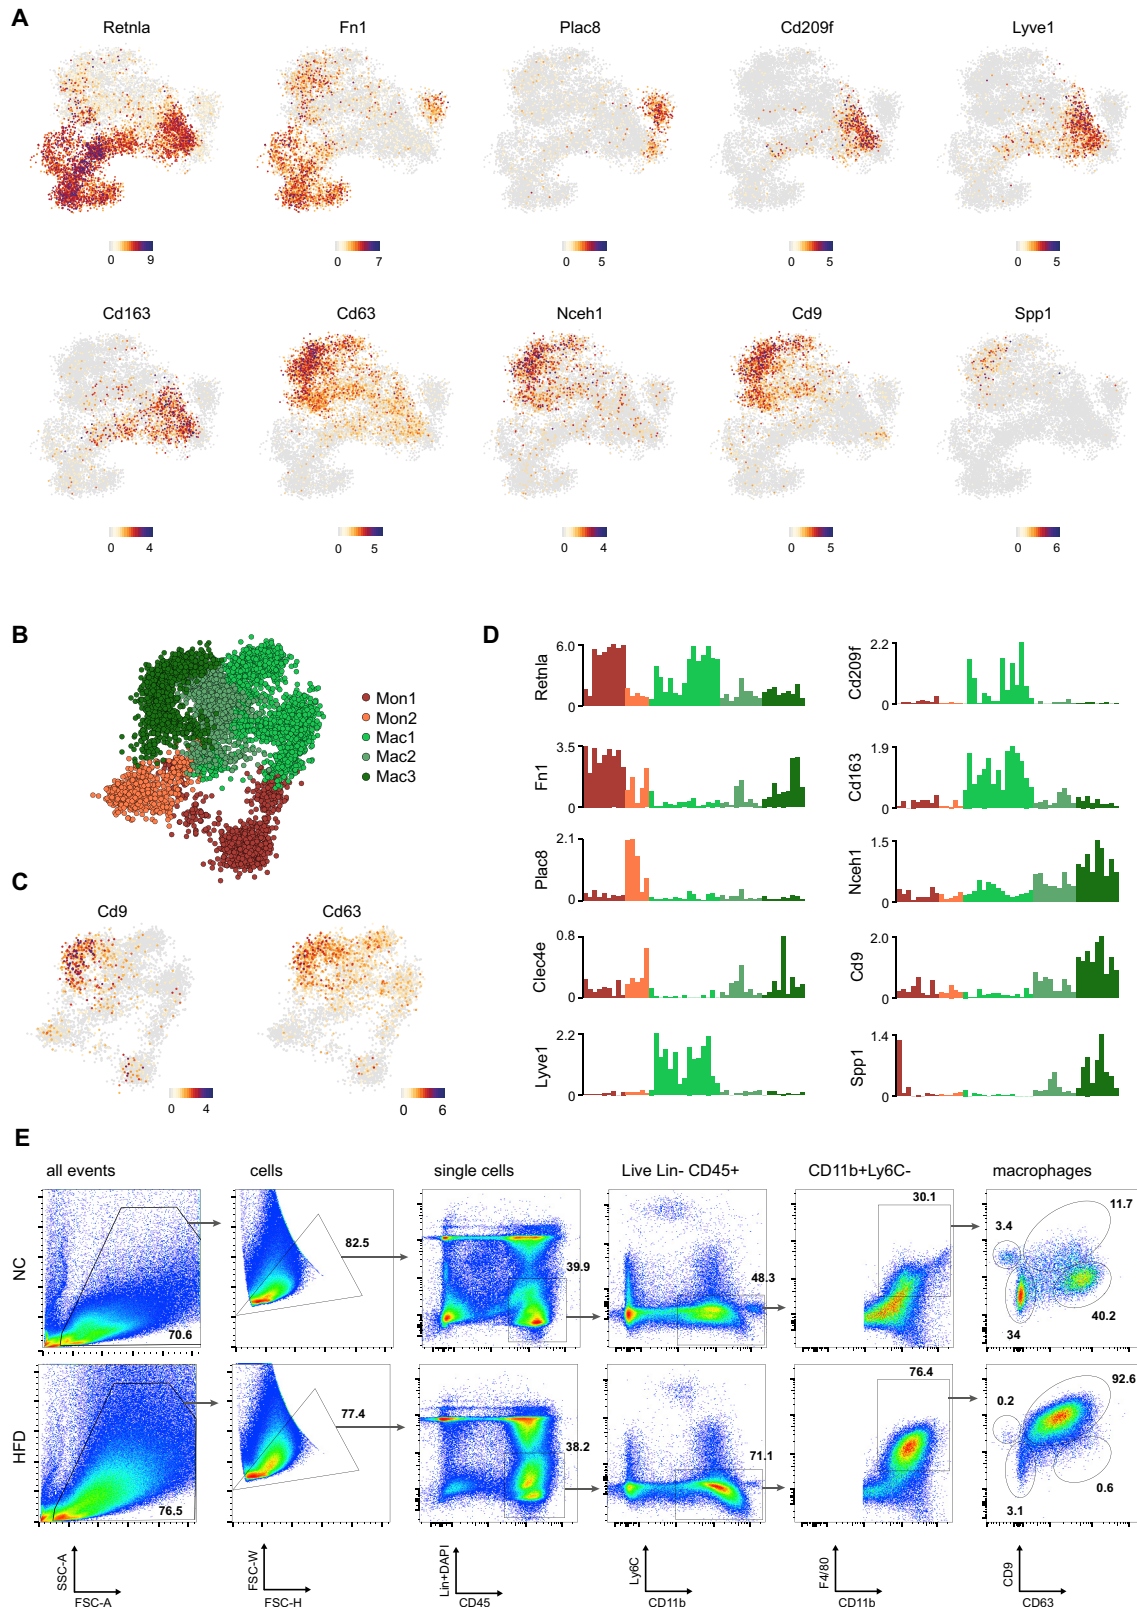

# Figure S3

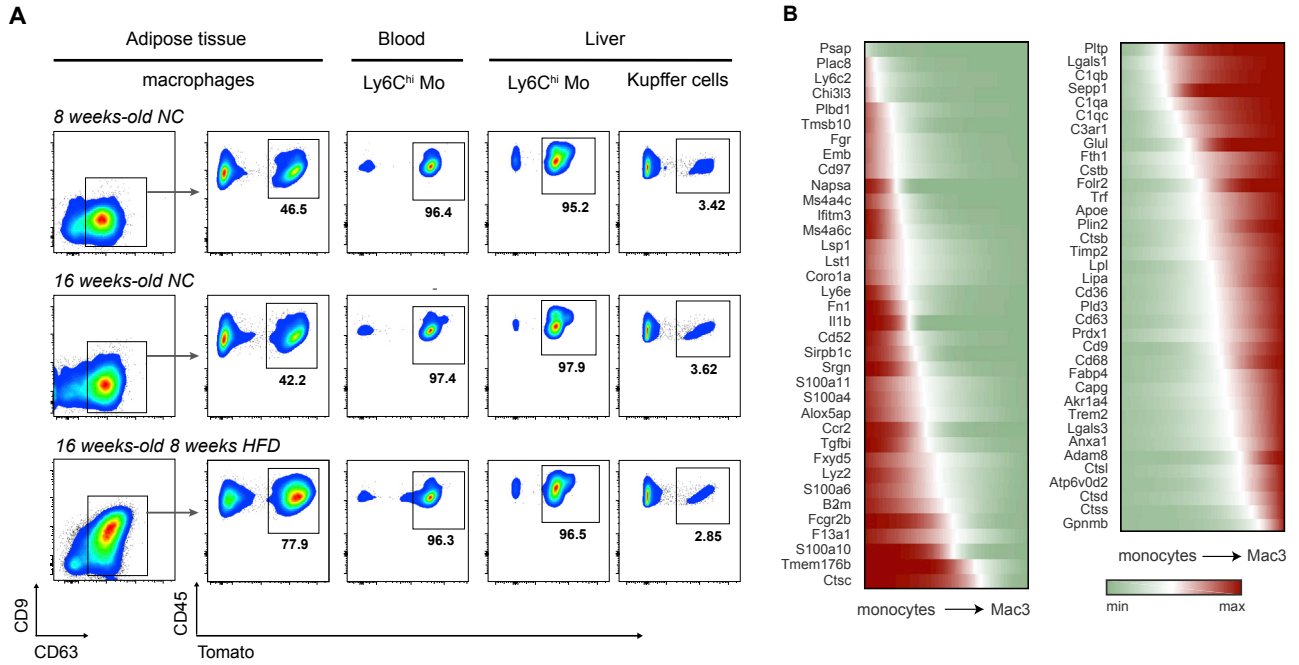

# Figure S4

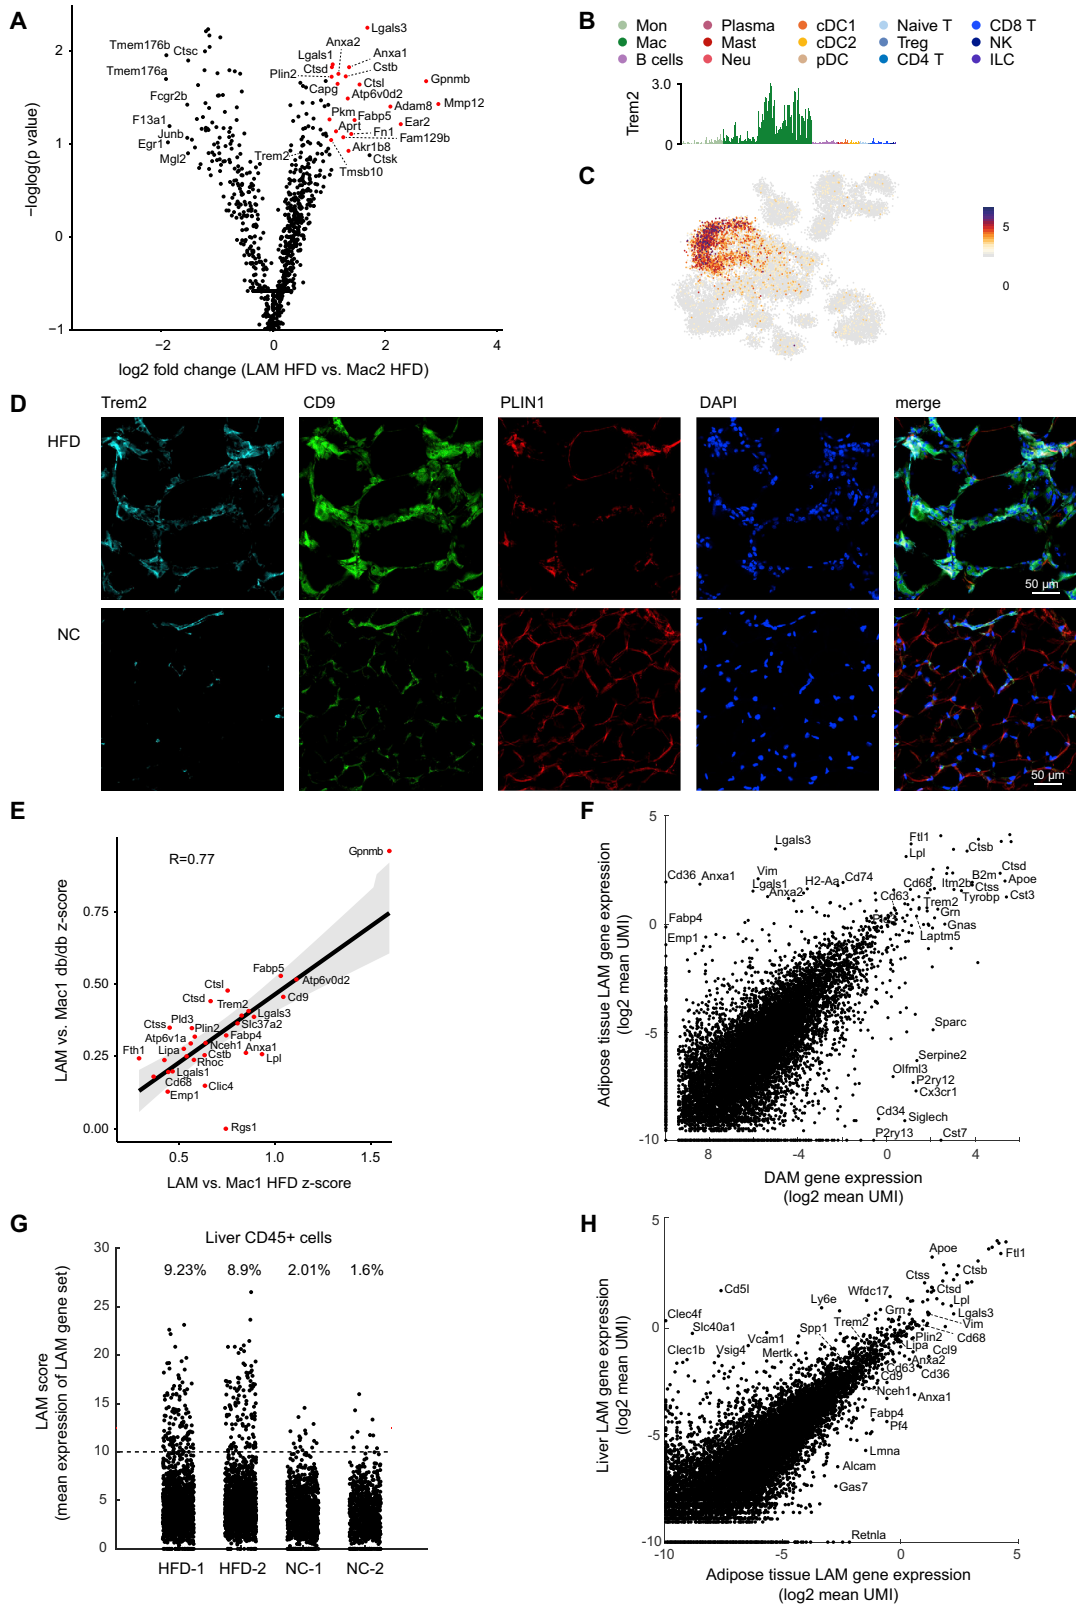

# Figure S5

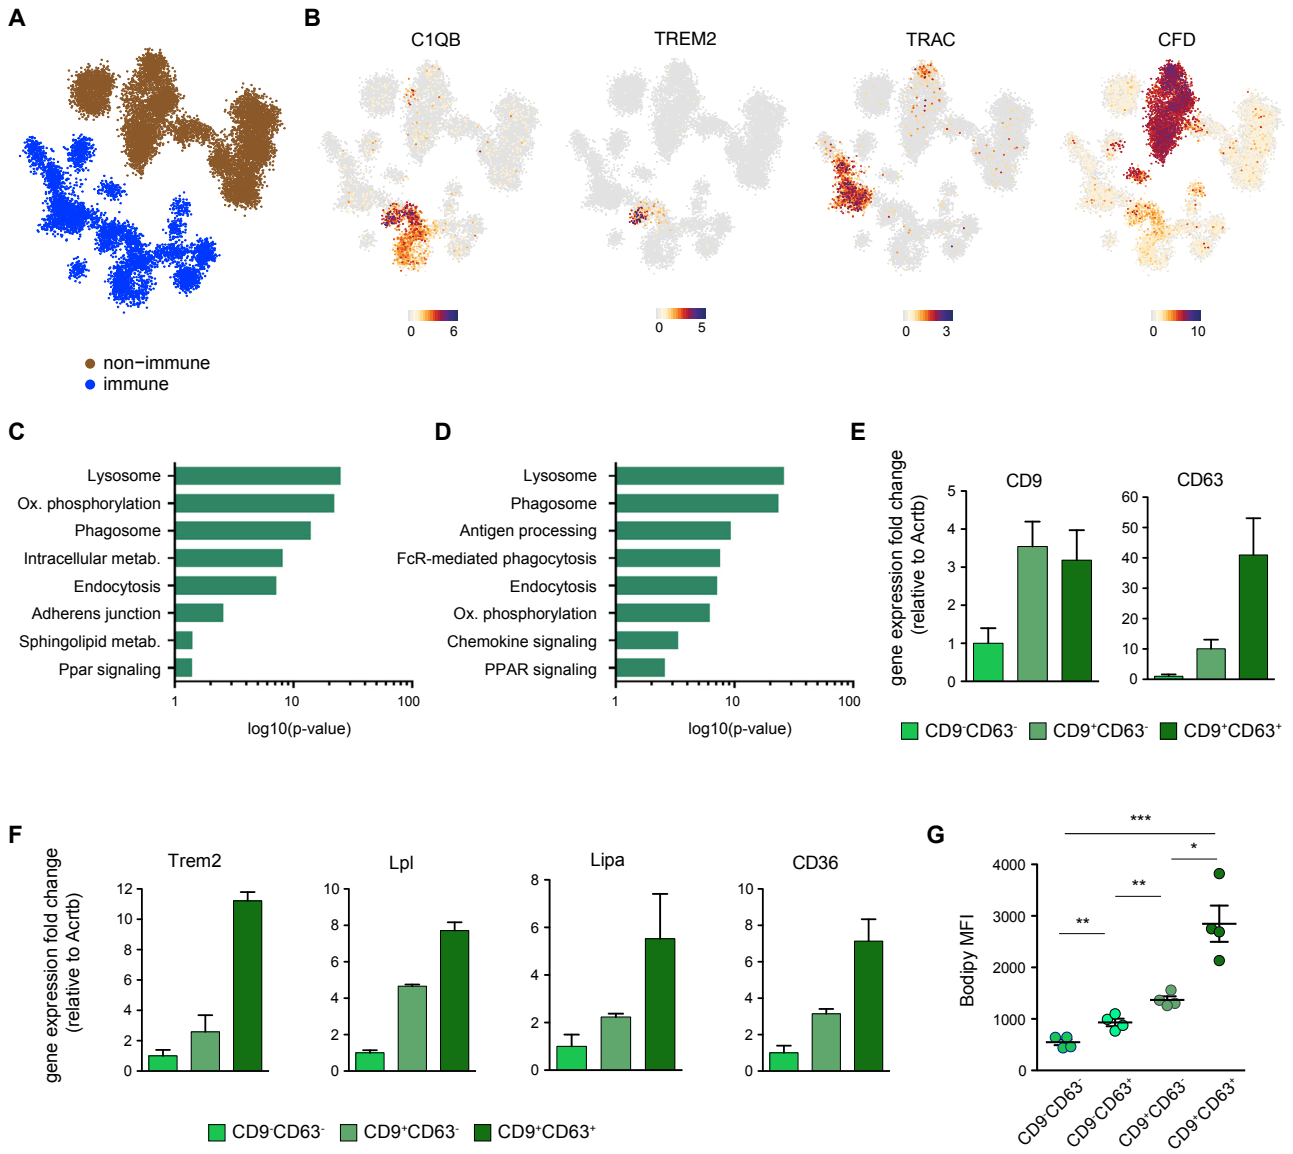

# Figure S6

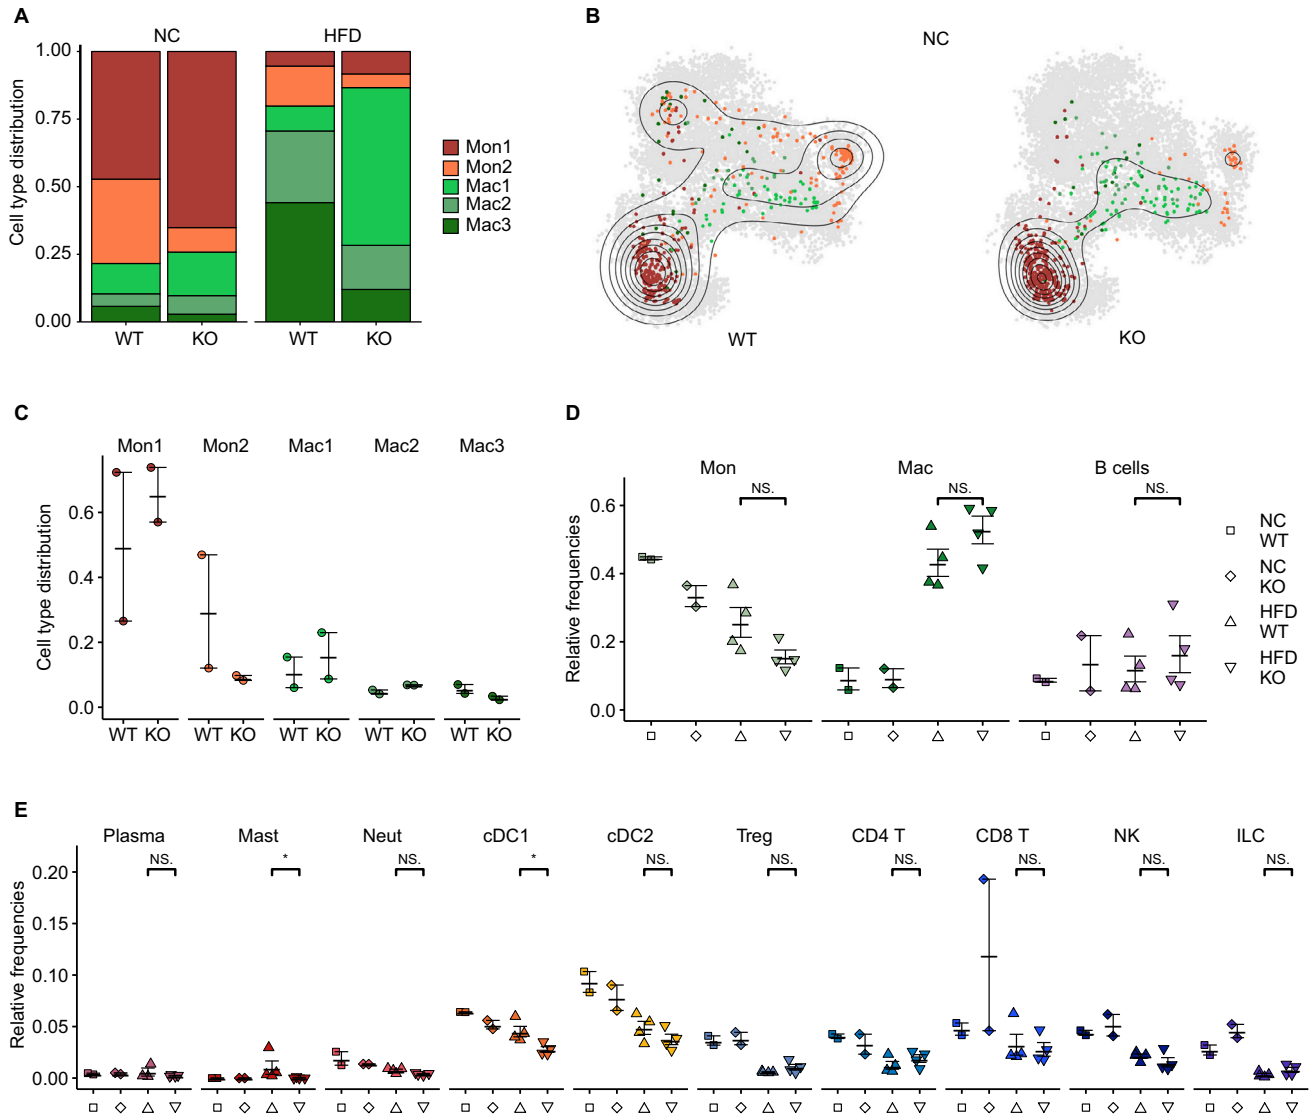

# Figure S7

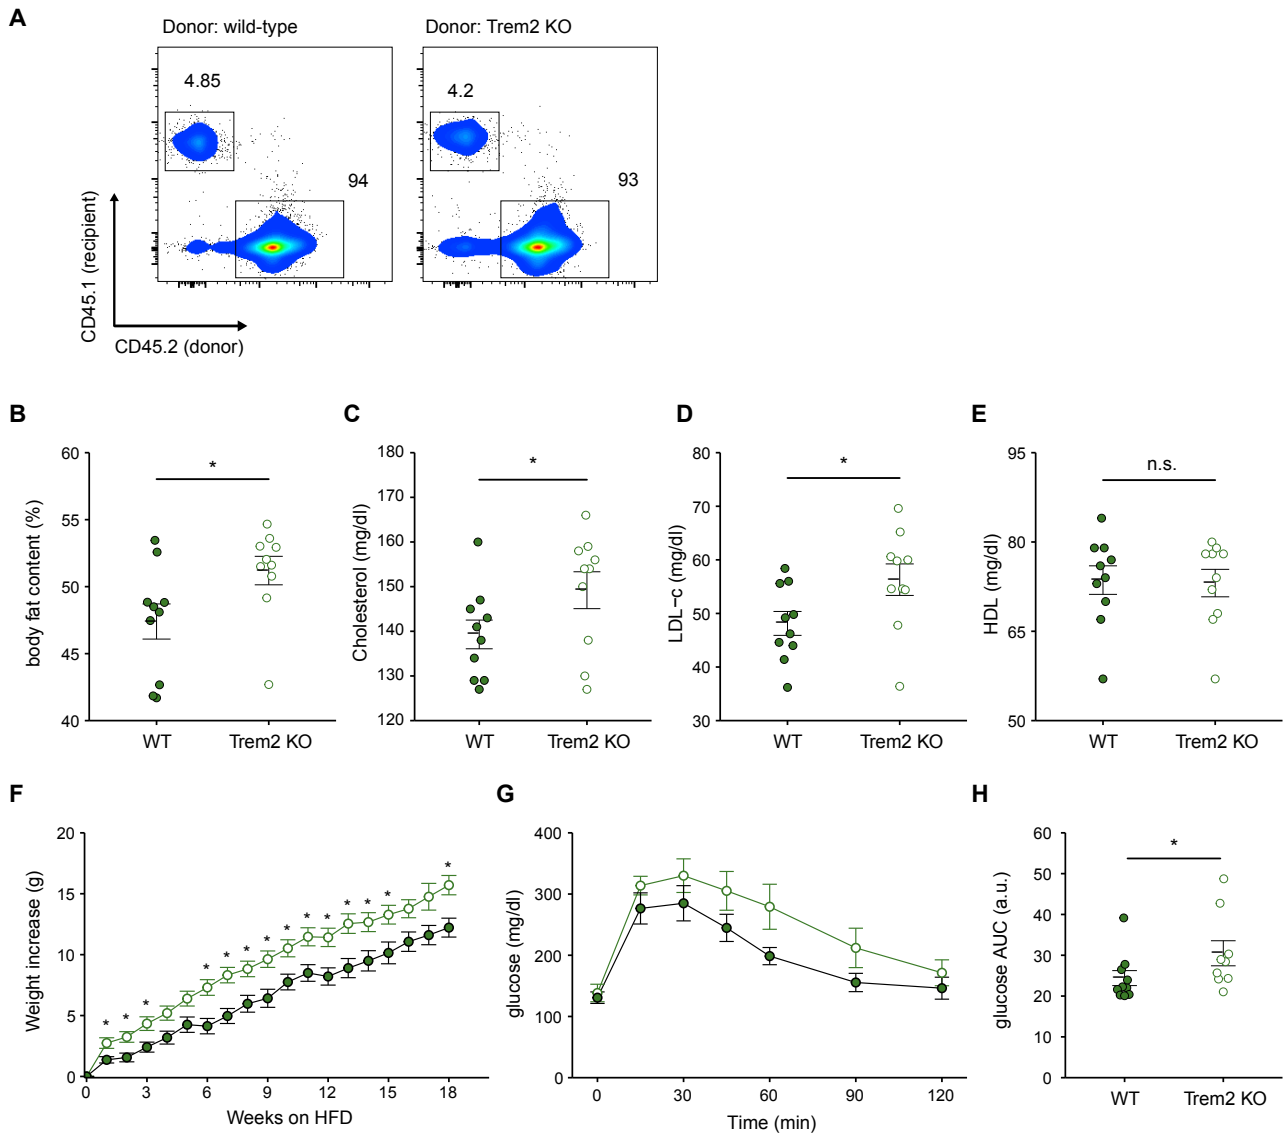

Supplement: NIHMS1561325-supplement-Supplemental.pdf [file NIHMS1561325-supplement-Supplemental.pdf]
